# Supplementary material for: Adsorption and decarbonylation of furfural over H-ZSM-5 zeolite: a DFT study
Source: Royal Society of Chemistry journal article supplement (doi:10.1039/c6ra24631a), 2016-01-01
Supplement: c6ra24631a1.pdf [file c6ra24631a1.pdf]

## Supplementary information

### Adsorption and Decarbonylation of Furfural over H-ZSM-5 zeolite: A DFT Study

Patipan Charoenwiangnuea<sup>a</sup>, Thana Maihom<sup>b\*</sup>, Pipat Kongpracha<sup>a</sup>, Jakkapan Sirijaraensre<sup>a</sup> and Jumras Limtrakul<sup>c</sup>

<sup>a</sup>*Department of Chemistry, and NANOTEC Center for Nanoscale Materials Design for Green Nanotechnology, Kasetsart University, Bangkok 10900, Thailand.*

<sup>b</sup>*Department of Chemistry, Faculty of Liberal Arts and Science, Kasetsart University, Kamphaeng Saen Campus, Nakhon Pathom 73140, Thailand.*

<sup>c</sup>*Department of Materials Science and Engineering, Vidyasirimedhi Institute of Science and Technology, Rayong 21210, Thailand.*

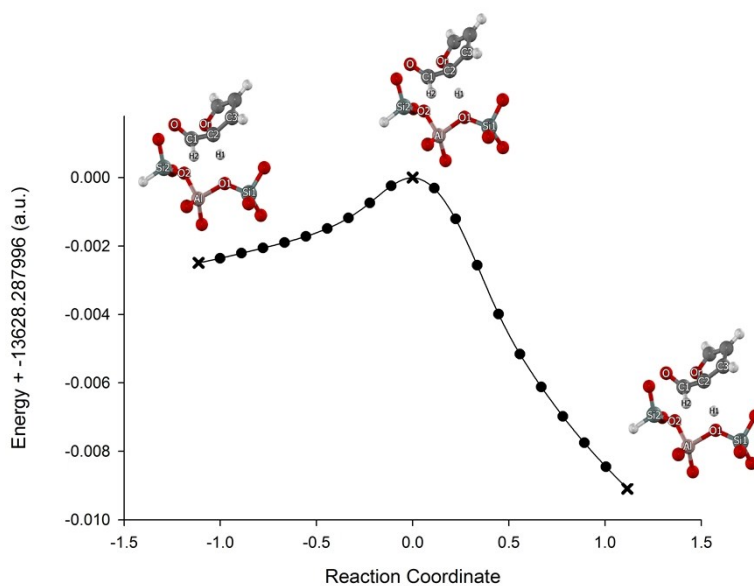

(a)

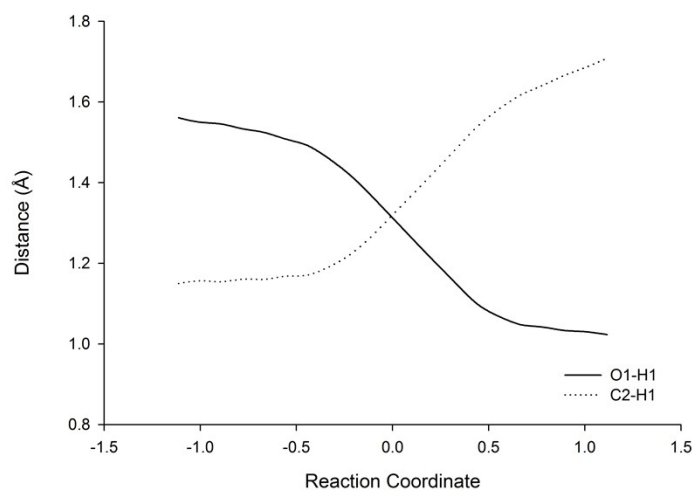

(c)

**Fig. S1** Results from the IRC calculation for the protonation of furfural to produce the secondary carbocation intermediate over H-ZSM-5 zeolite. (a) Energy profile and structural changes; (b) Evolution of the O1-H1 and C1-H1 distances along the reaction coordinate.

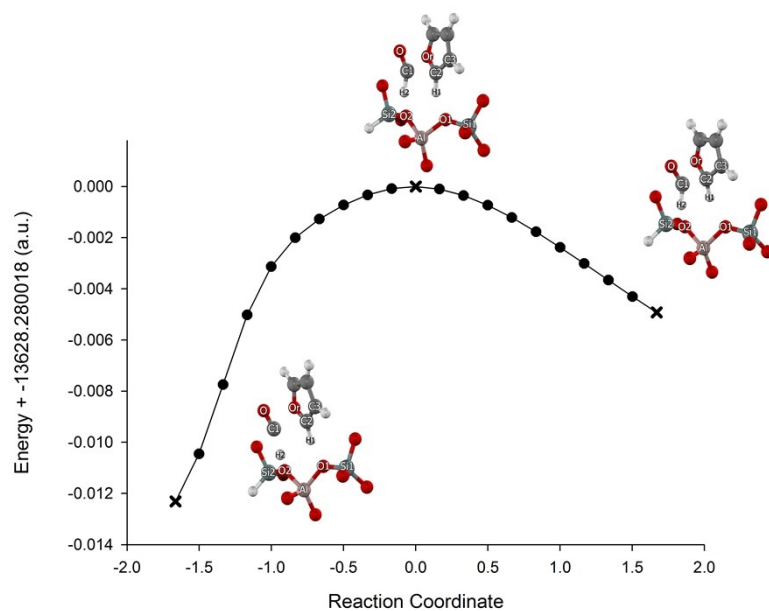

(a)

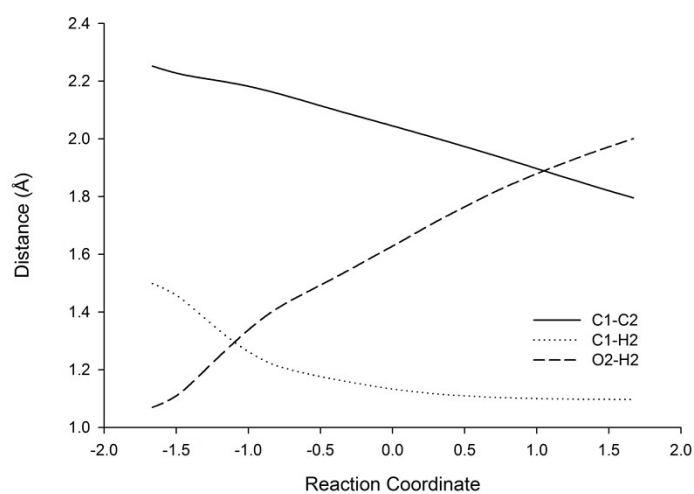

(b)

**Fig. S2** Results from the IRC calculation for the elimination of the CO group to the furan product over H-ZSM-5 zeolite. (a) Energy profile and structural changes; (b) Evolution of the C1-C2, C1-H2 and O2-H2 distances along the reaction coordinate.

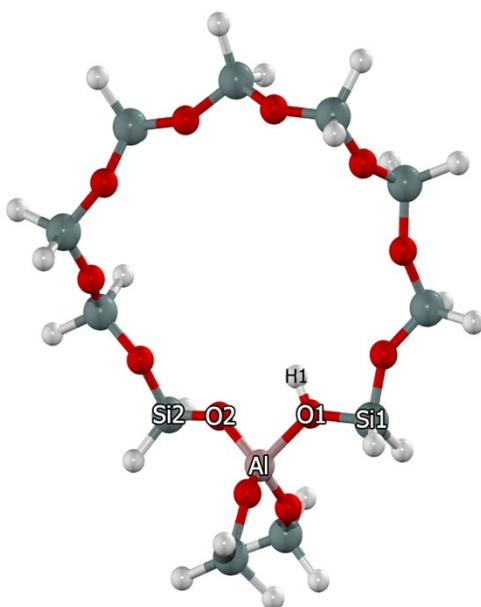

**Fig. S3** The 12T cluster model of H-ZSM-5 zeolite.

**Table S1.** Relative energies from  $\Delta E$ ,  $\Delta E_{\text{zero}}$ ,  $\Delta H$  and  $\Delta G$  values at 298.15 K for the first pathway of the furfural decarbonylation on H-ZSM-5 as calculated on the M06-2X/6-31G(d,p) level of theory.

| Reaction<br>coordinates | Relative energies (kcal/mol) |                          |                |                 |
|-------------------------|------------------------------|--------------------------|----------------|-----------------|
|                         | $\Delta E$                   | $\Delta E_{\text{zero}}$ | $\Delta H$     | $\Delta G$      |
| Ads_1                   | -19.6                        | -18.5                    | -18.1          | -5.5            |
| TS1_a                   | 4.8(Ea1=24.4)                | 2.6(Ea1=21.1)            | 2.5(Ea1=20.6)  | 16.6 (Ea1=22.1) |
| Int1_a                  | -2.9                         | -2.1                     | -1.8           | 11.0            |
| TS2_a                   | 7.1(Ea2=10.0)                | 9.3(Ea2=11.4)            | 9.3 (Ea2=11.2) | 23.3 (Ea2=12.3) |
| Prod                    | -15.7                        | -16.8                    | -15.4          | -5.5            |

**Table S2.** Relative energies from  $\Delta E$ ,  $\Delta E_{\text{zero}}$ ,  $\Delta H$  and  $\Delta G$  values at 298.15 K for the second pathway of the furfural decarbonylation on H-ZSM-5 as calculated on the M06-2X/6-31G(d,p) level of theory.

| Reaction<br>coordinates | Relative energies (kcal/mol) |                          |                 |                 |
|-------------------------|------------------------------|--------------------------|-----------------|-----------------|
|                         | $\Delta E$                   | $\Delta E_{\text{zero}}$ | $\Delta H$      | $\Delta G$      |
| Ads_1                   | -19.6                        | -18.5                    | -18.1           | -5.5            |
| TS1_b                   | 9.3 (Ea1=28.9)               | 7.9 (Ea1=26.4)           | 7.8 (Ea1=25.9)  | 22.2 (Ea1=27.7) |
| Int1_b                  | 7.1                          | 7.3                      | 7.7             | 20.8            |
| TS2_b                   | 25.6 (Ea2=18.5)              | 24.1 (Ea2=16.8)          | 24.4 (Ea2=16.7) | 37.2 (Ea2=16.4) |
| Int1_a                  | -2.9                         | -2.1                     | -1.8            | 11.0            |
| TS2_a                   | 7.1 (Ea3=10.0)               | 9.3 (Ea3=11.4)           | 9.3 (Ea3=11.2)  | 23.3 (Ea3=12.3) |
| Prod                    | -15.7                        | -16.8                    | -15.4           | -5.5            |

**Table S3.** Relative energies from  $\Delta E$ ,  $\Delta E_{\text{zero}}$ ,  $\Delta H$  and  $\Delta G$  values at 298.15 K for the third pathway of the furfural decarbonylation on H-ZSM-5 as calculated on the M06-2X/6-31G(d,p) level of theory.

| Reaction<br>coordinates | Relative energies (kcal/mol) |                          |                  |                 |
|-------------------------|------------------------------|--------------------------|------------------|-----------------|
|                         | $\Delta E$                   | $\Delta E_{\text{zero}}$ | $\Delta H$       | $\Delta G$      |
| Ads_3                   | -30.7                        | -29.8                    | -29.8            | -15.7           |
| TS1_c                   | -15.5 (Ea1=15.2)             | -13.3 (Ea1=16.5)         | -13.8 (Ea1=16.0) | 1.1 (Ea1=16.8)  |
| Int1_c                  | -16.5                        | -13.4                    | -13.7            | 1.0             |
| TS2_c                   | 34.7 (Ea2=51.2)              | 32.7 (Ea2=46.1)          | 32.6 (Ea2=46.3)  | 46.8 (Ea2=45.8) |
| Int1_b                  | 7.1                          | 7.3                      | 7.7              | 20.8            |
| TS2_b                   | 25.6 (Ea3=18.5)              | 24.1 (Ea3=16.8)          | 24.4 (Ea3=16.7)  | 37.2 (Ea3=16.4) |
| Int1_a                  | -2.9                         | -2.1                     | -1.8             | 11.0            |
| TS2_a                   | 7.1 (Ea4=10.0)               | 9.3 (Ea4=11.4)           | 9.3 (Ea4=11.2)   | 23.3 (Ea4=12.3) |
| Prod                    | -15.7                        | -16.8                    | -15.4            | -5.5            |
